# Supplementary material for: Fluoroquinolone-derived fluorescent probes for studies of bacterial penetration and efflux
Source: PubMed Central journal article supplement (PMC6596217; doi:10.1039/c9md00124g), 2019-05-17

## **Fluoroquinolone-Derived Fluorescent Probes for Studies of Bacterial Penetration and Efflux**

M. Rhia L. Stone,<sup>a</sup> Muriel Masi,<sup>b,d</sup> Wanida Phetsang,<sup>a</sup> Jean-Marie Pagès,<sup>b</sup> Matthew A Cooper<sup>a</sup> and Mark A. T. Blaskovich<sup>\*a,c</sup>

### **Supplementary Material**

## LCMS Data for cipro-NBD 3

Obtained on a Shimadzu LCMS-2020 LCMS using 0.05% formic acid in water as solvent A and 0.05% formic acid in acetonitrile as solvent B. Zorbax Eclipse XDB-Phenyl column, 3 x 100 mm, 3.5  $\mu$ m. Method: 5% B for 3 mins, up to 100% B over 8 mins, 5% for 2 mins.

Sample File C:\LabSolutions\Data\RES\_2019\_04\_12\mrls-cipro-nbd\_003.lcd  
Date Acquired : 12/04/2019 4:58:17 PM Sample Name : mrls-cipro-nbd  
Method File : C3\_T13\_G0009.lcm

Date Acquired : 12/04/2019 4:58:17 PM Sample Name : mrls-cipro-nbd  
Sample ID : Tray# : 1  
Vial# : 24 Injection Volume : 10  
Data File : mrls-cipro-nbd\_003.lcd Method File : C3\_T13\_G0009.lcm  
Date Processed : 12/04/2019 5:11:21 PM

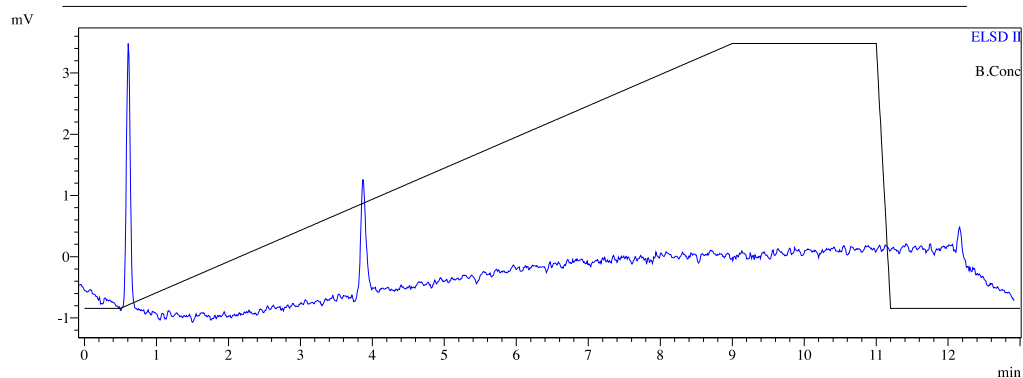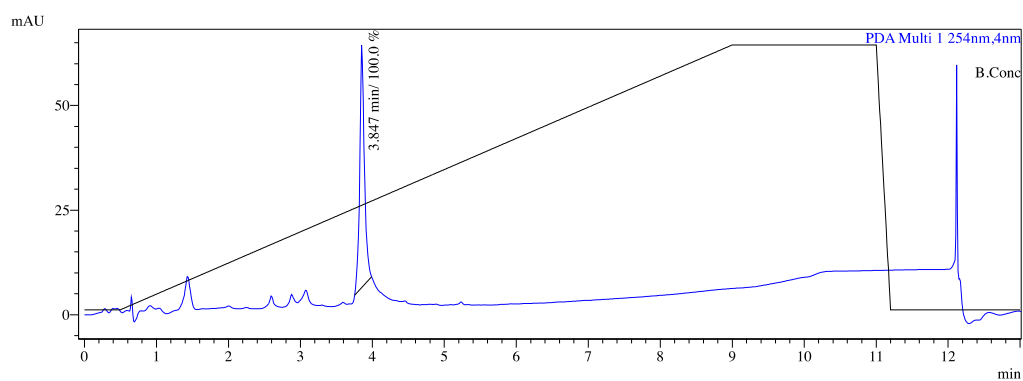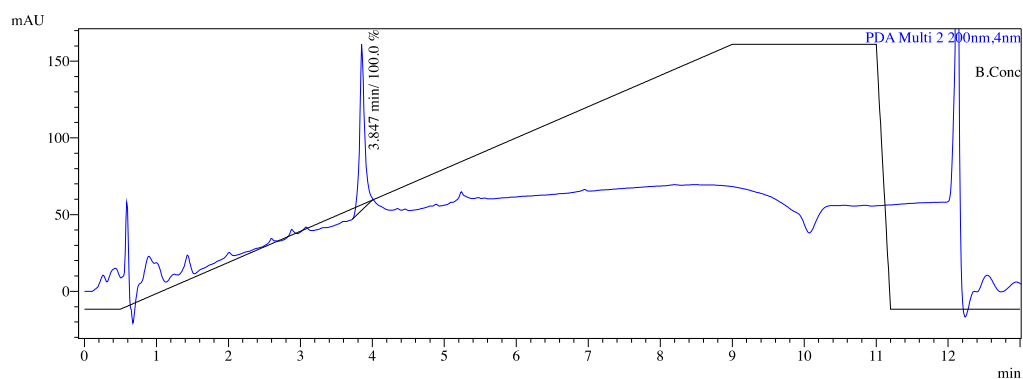

Sample File C:\LabSolutions\Data\RES\_2019\_04\_12\mrls-cipro-nbd\_003.lcd  
 Date Acquired : 12/04/2019 4:58:17 PM Sample Name : mrls-cipro-nbd  
 Method File : C3\_T13\_G0009.lcm

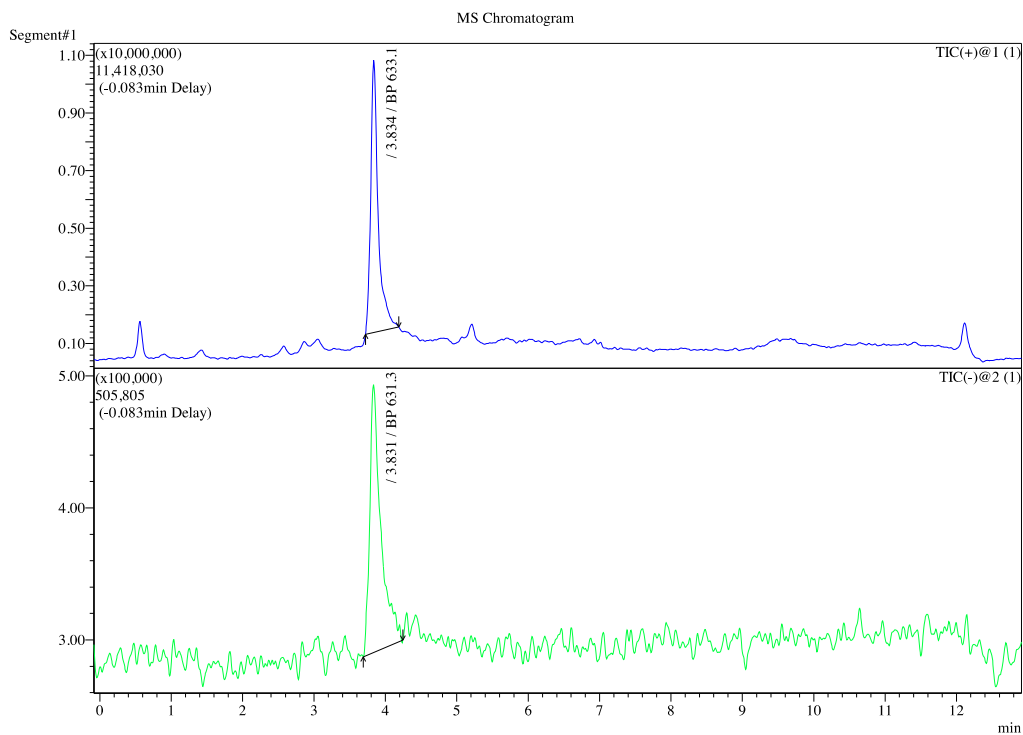

Peak#:1 R.Time:3.831(Scan#:1342)  
 Spectrum Mode:Averaged 3.693-4.247(1296-1486)  
 BG Mode:Averaged 4.247-4.253(1486-1488) Segment 1 - Event 2

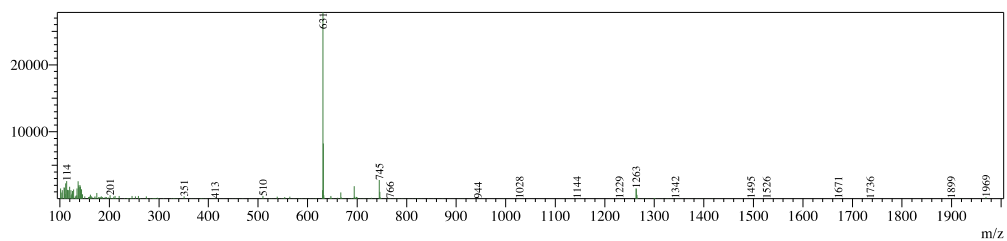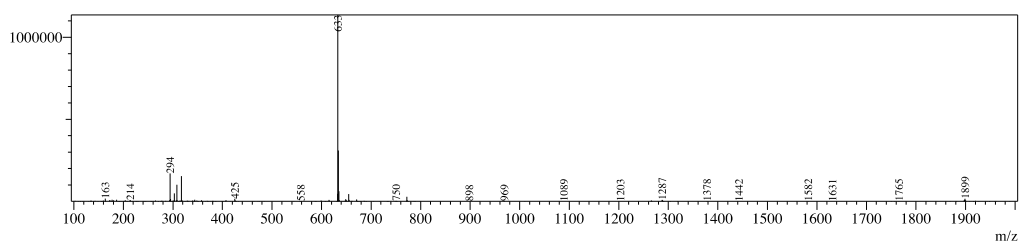

Cooper Group  
 Institute of Molecular Bioscience  
 The University of Queensland

Sample File C:\LabSolutions\Data\RES\_2019\_04\_12\mrls-cipro-nbd\_003.lcd  
 Date Acquired : 12/04/2019 4:58:17 PM Sample Name : mrls-cipro-nbd  
 Method File : C3\_T13\_G0009.lcm

## UV Peak Table mrls-cipro-nbd\_003.lcd

| Peak# | Ret. Time | Area | Area% | Height | Height% | S/N | Peak Purity Index | Name |
|-------|-----------|------|-------|--------|---------|-----|-------------------|------|
| Total |           |      |       |        |         |     |                   |      |

## PDA Ch1 254nm

| Peak# | Ret. Time | Area   | Area%   | Height | Height% | S/N   | Peak Purity Index | Name |
|-------|-----------|--------|---------|--------|---------|-------|-------------------|------|
| 1     | 3.847     | 262717 | 100.000 | 58096  | 100.000 | 17.44 | 1.000000          |      |
| Total |           | 262717 | 100.000 | 58096  | 100.000 |       |                   |      |

## PDA Ch2 200nm

| Peak# | Ret. Time | Area   | Area%   | Height | Height% | S/N  | Peak Purity Index | Name |
|-------|-----------|--------|---------|--------|---------|------|-------------------|------|
| 1     | 3.847     | 520164 | 100.000 | 108332 | 100.000 | 3.04 | 1.000000          |      |
| Total |           | 520164 | 100.000 | 108332 | 100.000 |      |                   |      |

## MASS Peak Table ALL.MC

| Peak# | Ret. Time | Base Peak m/z | Area     | Area%   | Height  | Event# | Compound Name |
|-------|-----------|---------------|----------|---------|---------|--------|---------------|
| 1     | 3.834     | 633.05        | 69156097 | 100.000 | 9452115 | 1-1    |               |
| 2     | 3.831     | 631.30        | 2215298  | 100.000 | 202817  | 1-2    |               |
| Total |           |               | 71371395 | 200.000 |         |        |               |

## Method Information

## &lt;&lt;Pump&gt;&gt;

Mode : Binary gradient  
 Pump A : LC-20AD  
 Pump B : LC-20AD  
 Total Flow : 1.0000 mL/min  
 B Conc. : 5.0 %  
 B Curve : 0  
 PressMax : 3000 psi  
 PressMin : 200 psi  
 Solenoid Valve A Name : FCV-11AL  
 Solenoid Valve A : A-A-A

## &lt;&lt;LC Time Program&gt;&gt;

| Time  | Module     | Command      | Value | Comment                                       |
|-------|------------|--------------|-------|-----------------------------------------------|
| 0.50  | Pumps      | Pump B Conc. | 5     |                                               |
| 9.00  | Pumps      | Pump B Conc. | 100   | Zorbax Eclipse XDB-Phenyl, 3.0 x100mm, 3.5 um |
| 11.00 | Pumps      | Pump B Conc. | 100   |                                               |
| 11.20 | Pumps      | Pump B Conc. | 5     |                                               |
| 13.00 | Controller | Stop         |       |                                               |

## &lt;&lt;Oven&gt;&gt;

Oven Model : CTO-20AC  
 Enable Oven : Use  
 Oven Temperature : 40 C  
 Maximum Temperature : 90 C  
 Rotary Valve L : FCV-14AH  
 Rotary Valve R : FCV-14AH  
 Valve L : 3  
 Valve R : 3

## LCMS Data on cipro-DMACA 4

Obtained on an Agilent 1200 series LCMS using 0.05% formic acid in water as solvent A and 0.05% formic acid in acetonitrile as solvent B. Eclipse Phenyl column. Method: 0.3 min 5% B, 3.2 min 100%, 5.2 min 100%, 5.5 min 5%, 7.00 min 5%.

Data File F:\A\_MRLSPHD03042A-G1-I2-F13.D

Sample Name: MRLSPHD03042A-G1-I2-F13

```

=====
Acq. Operator   : Cooper                               Seq. Line :    3
Acq. Instrument : Instrument 1                         Location  : F1-E-03
Injection Date  : 7/24/2018 3:58:27 PM                Inj       :    1
                                                    Inj Volume: 1.0 µl
Different Inj Volume from Sequence !   Actual Inj Volume : 20.0 µl
Acq. Method     : D:\SHARE\DATA\RES_2018_07_24\SEQ_2018_07_24_02 2018-07-24 15-39-49\C4T07_
                  G0003_U210P.M
Last changed    : 3/21/2018 2:15:34 PM by Cooper
Analysis Method : D:\COOPER\METHODS\YN6C_2018_POS1_G0015_U210_254_COLLECT.M
Last changed    : 3/8/2019 1:08:18 PM by Cooper Group
Additional Info  : Peak(s) manually integrated
=====

```

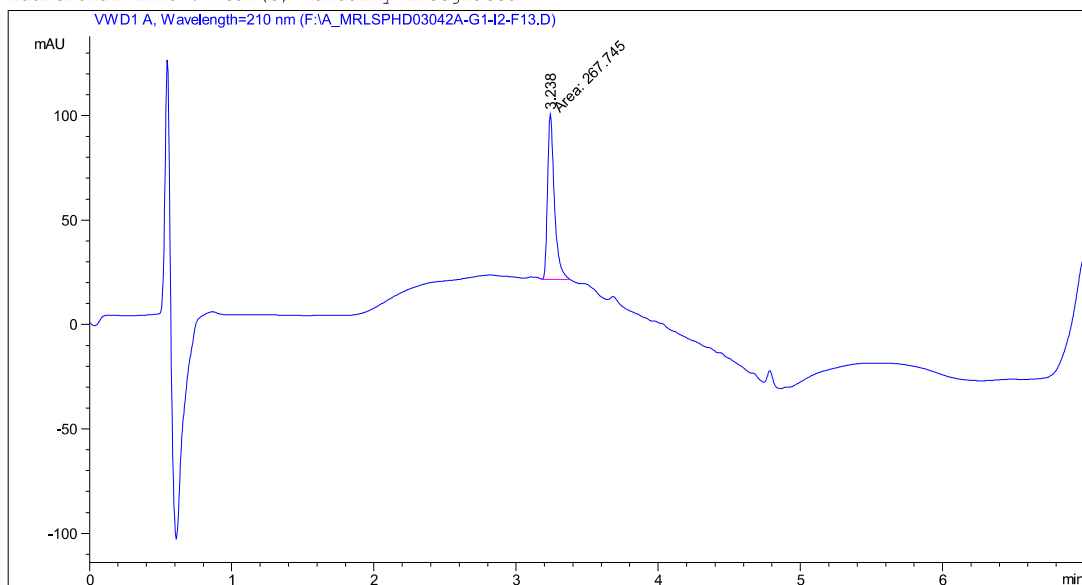

### Area Percent Report

```

=====
Sorted By      :      Signal
Multiplier:    :      1.0000
Dilution:      :      1.0000
Use Multiplier & Dilution Factor with ISTDs
=====

```

Signal 1: VWD1 A, Wavelength=210 nm

| Peak # | RetTime [min] | Type | Width [min] | Area mAU*s | Height [mAU] | Area %   |
|--------|---------------|------|-------------|------------|--------------|----------|
| 1      | 3.238         | MM   | 0.0562      | 267.74527  | 79.35232     | 100.0000 |

```
Totals :                267.74527    79.35232
```

Sample Name : MRLSPHD03042A-G1-I2-F13

Data File : D:\SHARE\DATA\RES\_2018\_07\_24\SEQ\_2018\_07\_24\_02 2018-07-24 15-39-49\A\_ ->

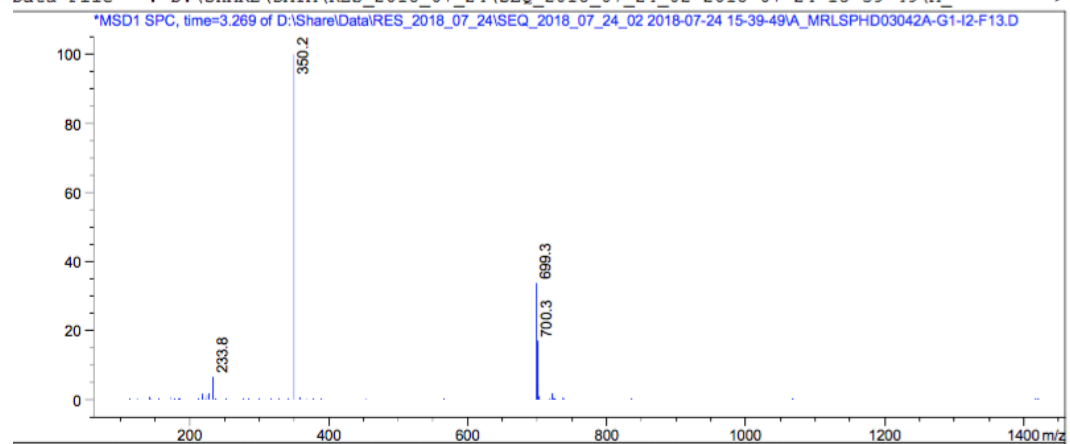

Supplement: MD-010-C9MD00124G-s001.pdf [file MD-010-C9MD00124G-s001.pdf]
